# Supplementary material for: Effect of the Sr–Fe layered double hydroxide coating based on the microenvironment response on implant osseointegration in osteoporotic rats
Source: Royal Society of Chemistry journal article supplement (doi:10.1039/d3tb02410e), 2024-01-01
Supplement: d3tb02410e1.pdf [file d3tb02410e1.pdf]

# Effect of Sr-Fe Layered double hydroxides coating based on microenvironment response on implant osseointegration in osteoporotic rats

Chenyu Liao<sup>1</sup>, Dongcai He<sup>2</sup>, Kaiwen Yin<sup>1</sup>, Yuhung Lin<sup>1</sup>, Yihan Chen<sup>6,7</sup>, Ziqiang

Zhang<sup>2</sup>, Jing Zhang<sup>5</sup>, Hongrong Luo<sup>4</sup>, Xianchun Chen<sup>3</sup>(✉), Yunfeng Li<sup>1</sup>(✉)

<sup>1</sup> *State Key Laboratory of Oral Diseases & National Center for Stomatology & National Clinical Research Center for Oral Diseases & Department of Oral & Maxillofacial Surgery, West China Hospital of Stomatology, Sichuan University, Chengdu, 610041, China*

<sup>2</sup> *College of Materials Science and Engineering, Sichuan University, No.24 South Section 1, Yihuan Road, Chengdu, 610065, China*

<sup>3</sup> *College of Polymer Science and Engineering, Sichuan University, No.24 South Section 1, Yihuan Road, Chengdu, 610065, China*

<sup>4</sup> *College of Biomedical Engineering, Sichuan University, No.24 South Section 1, Yihuan Road, Chengdu, 610065, China*

<sup>5</sup> *College of Architecture and Environment, Sichuan University, Chengdu, Sichuan 610065, China*

<sup>6</sup> *Shanghai Institute of Ceramics Chinese Academy of Science; Research Unit of Nanocatalytic Medicine iSpecific Therapy for Serious Disease, Chinese Academy of Medical Sciences, Shanghai 200050, P.R.China*

<sup>7</sup> *Center of Materials Science and Optoelectronics Engineering, University of Chinese Academy of Sciences, Beijing 100049, P.R.China*

## Corresponding Authors

1. Xianchun Chen, E-mail: [chenxianchun@scu.edu.cn](mailto:chenxianchun@scu.edu.cn)

2. Yunfeng Li, E-mail: [liyunfeng@scu.edu.cn](mailto:liyunfeng@scu.edu.cn)

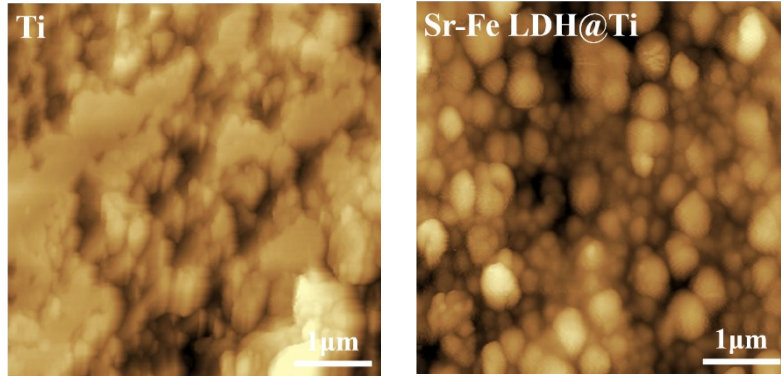

Fig. S1A: AFM images and quantitative analysis of Ti and Sr-Fe LDH@Ti

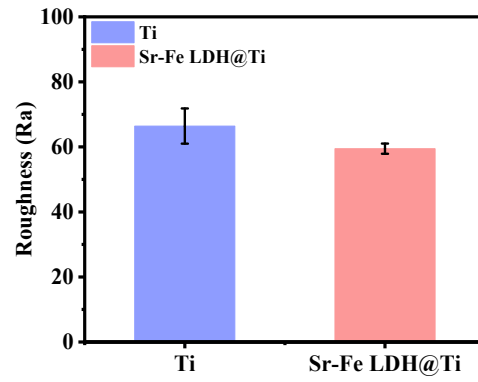

Fig. S1B: Roughness of the Ti and Sr-Fe LDH@Ti; n=3

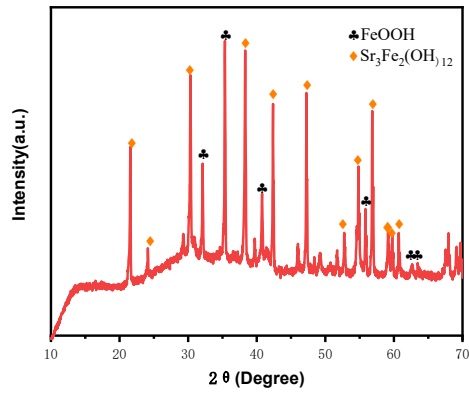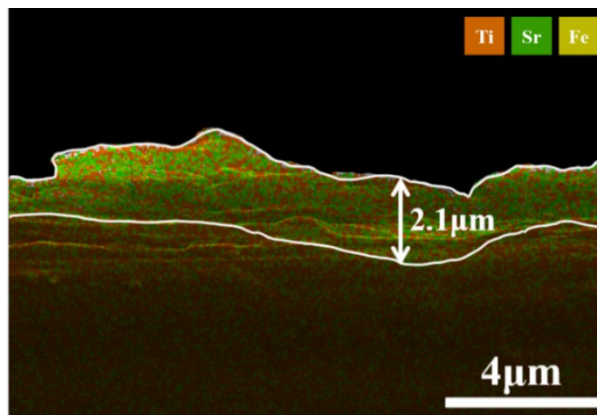

Fig.S2: XRD patterns of Sr-Fe LDH powders

Fig S3: EDS spectrograms showing the thickness of the Sr-Fe LDH coating on pure titanium surfaces of the

Fig. S4: EDS energy spectroscopy of Sr-Fe LDH@Ti after 7 days immersion in PBS solutions of different pH values; n=3

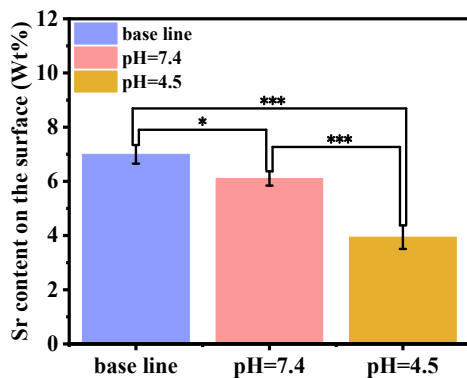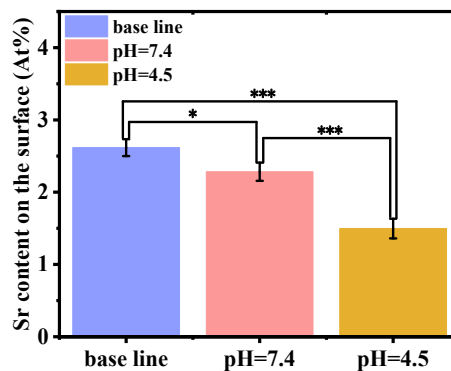

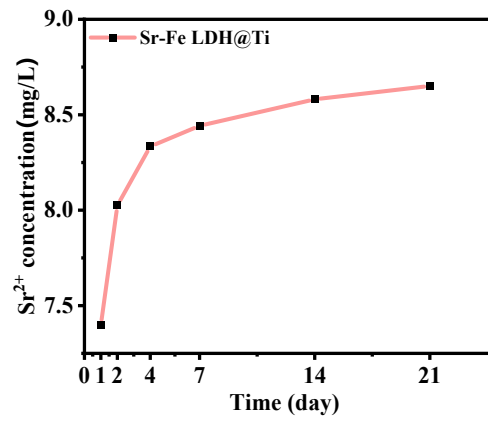

Fig. S5: The release curves of Sr<sup>2+</sup> ions from the Sr-Fe LDH@Ti in PBS solution at pH=7.4.

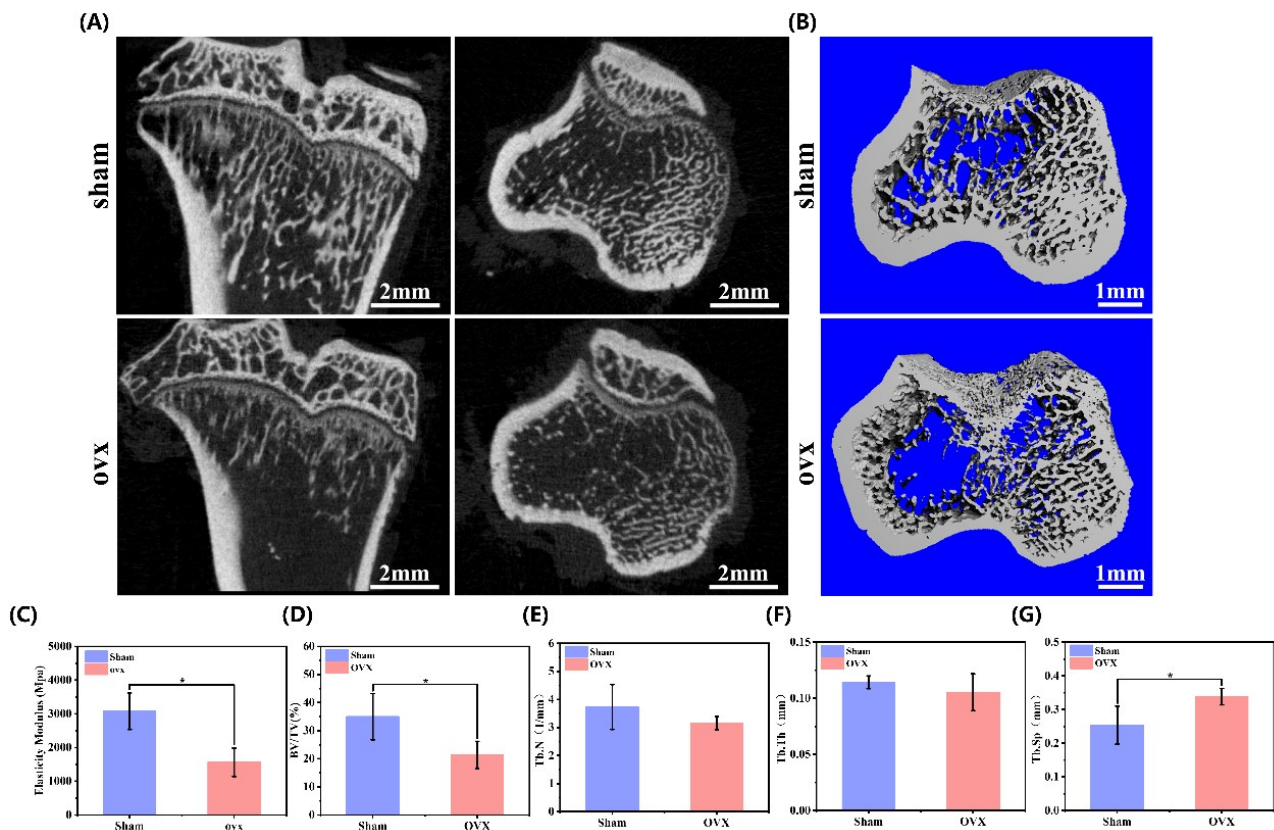

Fig. S6: (A)X-ray images of rat tibia 12w after sham and ovariectomy surgery. (B)Micro-CT images of rat tibia 12w after sham and ovariectomy surgery. (C)Elastic modulus analysis of rat tibia 12w after sham and ovariectomy surgery. (D-G) BV/TV(%), TB.N(1/mm), Tb.Th(mm), Tb.Sp(mm) analysis for rat tibia 12w after sham and ovariectomy surgery. All values are presented as mean  $\pm$  s.d. \*P < 0.05, \*\*P < 0.01, and \*\*\*P < 0.001; n=4.
